# Supplementary material
Source: PubMed Central journal article supplement (PMC4254266)
Supplement: NIHMS625504-supplement-01.pdf [file NIHMS625504-supplement-01.pdf]

## Online Supplemental Materials

**Supplemental Table 1** Associations between IOM 2009 GWG categories and mid-childhood cardiometabolic risk biomarkers<sup>a,b</sup>

|                         |            | Mean difference (95% CI) in offspring cardiometabolic risk biomarkers |                     |                     |
|-------------------------|------------|-----------------------------------------------------------------------|---------------------|---------------------|
|                         |            | Model 1                                                               | Model 2             | Model 3             |
| HOMA-IR                 | Inadequate | 0.00 (-0.20, 0.20)                                                    | 0.01 (-0.19, 0.21)  | 0.09 (-0.11, 0.28)  |
|                         | Adequate   | 0.00 (Reference)                                                      | 0.00 (Reference)    | 0.00 (Reference)    |
|                         | Excessive  | -0.01 (-0.14, 0.13)                                                   | 0.01 (-0.14, 0.15)  | 0.02 (-0.12, 0.16)  |
| Triglycerides (mg/dL)   | Inadequate | 0.00 (-0.11, 0.10)                                                    | 0.00 (-0.10, 0.11)  | 0.03 (-0.07, 0.14)  |
|                         | Adequate   | 0.00 (Reference)                                                      | 0.00 (Reference)    | 0.00 (Reference)    |
|                         | Excessive  | 0.02 (-0.05, 0.10)                                                    | 0.02 (-0.05, 0.10)  | 0.04 (-0.04, 0.11)  |
| Leptin (ng/mL)          | Inadequate | -0.16 (-0.38, 0.05)                                                   | -0.17 (-0.38, 0.04) | -0.08 (-0.28, 0.12) |
|                         | Adequate   | 0.00 (Reference)                                                      | 0.00 (Reference)    | 0.00 (Reference)    |
|                         | Excessive  | 0.03 (-0.12, 0.17)                                                    | 0.03 (-0.12, 0.17)  | 0.00 (-0.13, 0.14)  |
| Adiponectin (µg/mL)     | Inadequate | -0.02 (-0.18, 0.14)                                                   | -0.03 (-0.19, 0.13) | -0.10 (-0.26, 0.07) |
|                         | Adequate   | 0.00 (Reference)                                                      | 0.00 (Reference)    | 0.00 (Reference)    |
|                         | Excessive  | 0.01 (-0.09, 0.12)                                                    | 0.01 (-0.10, 0.11)  | -0.04 (-0.15, 0.07) |
| hsCRP (mg/L)            | Inadequate | -0.28 (-0.71, 0.15)                                                   | -0.28 (-0.71, 0.15) | -0.05 (-0.47, 0.36) |
|                         | Adequate   | 0.00 (Reference)                                                      | 0.00 (Reference)    | 0.00 (Reference)    |
|                         | Excessive  | -0.17 (-0.46, 0.13)                                                   | -0.14 (-0.44, 0.16) | -0.16 (-0.45, 0.13) |
| IL-6 (pg/mL)            | Inadequate | 0.01 (-0.21, 0.23)                                                    | 0.01 (-0.21, 0.23)  | 0.11 (-0.11, 0.34)  |
|                         | Adequate   | 0.00 (Reference)                                                      | 0.00 (Reference)    | 0.00 (Reference)    |
|                         | Excessive  | 0.08 (-0.07, 0.23)                                                    | 0.10 (-0.05, 0.25)  | 0.10 (-0.05, 0.26)  |
| SBP (mmHg) <sup>c</sup> | Inadequate | -0.04 (-1.71, 1.63)                                                   | -0.05 (-0.72, 1.62) | 0.67 (-1.11, 2.46)  |
|                         | Adequate   | 0.00 (Reference)                                                      | 0.00 (Reference)    | 0.00 (Reference)    |
|                         | Excessive  | 0.39 (-0.73, 1.52)                                                    | 0.08 (-1.05, 1.21)  | 0.07 (-1.14, 1.28)  |

**Model 1:** Adjusted for maternal pre-pregnancy BMI, and child's sex and age at examination.

**Model 2:** Model 1 + maternal race/ethnicity, parity, and smoking habits during pregnancy, father's BMI, and annual household income.

**Model 3:** Model 2 + DXA total fat mass index. Estimates for SBP are additional adjusted for height z-score.

**a** Estimates are derived from imputed data.

**b** All biomarkers are natural log transformed except for SBP.

**c** All models for SBP are additionally adjusted for height z-score.
